# Supplementary material
Source: Research Square preprint supplement (doi:10.21203/rs.3.rs-8972446/v1)
Supplement: Supplementary file 1 [file 08e4fa1c955605d052ade43b.docx]

**Supporting Information**


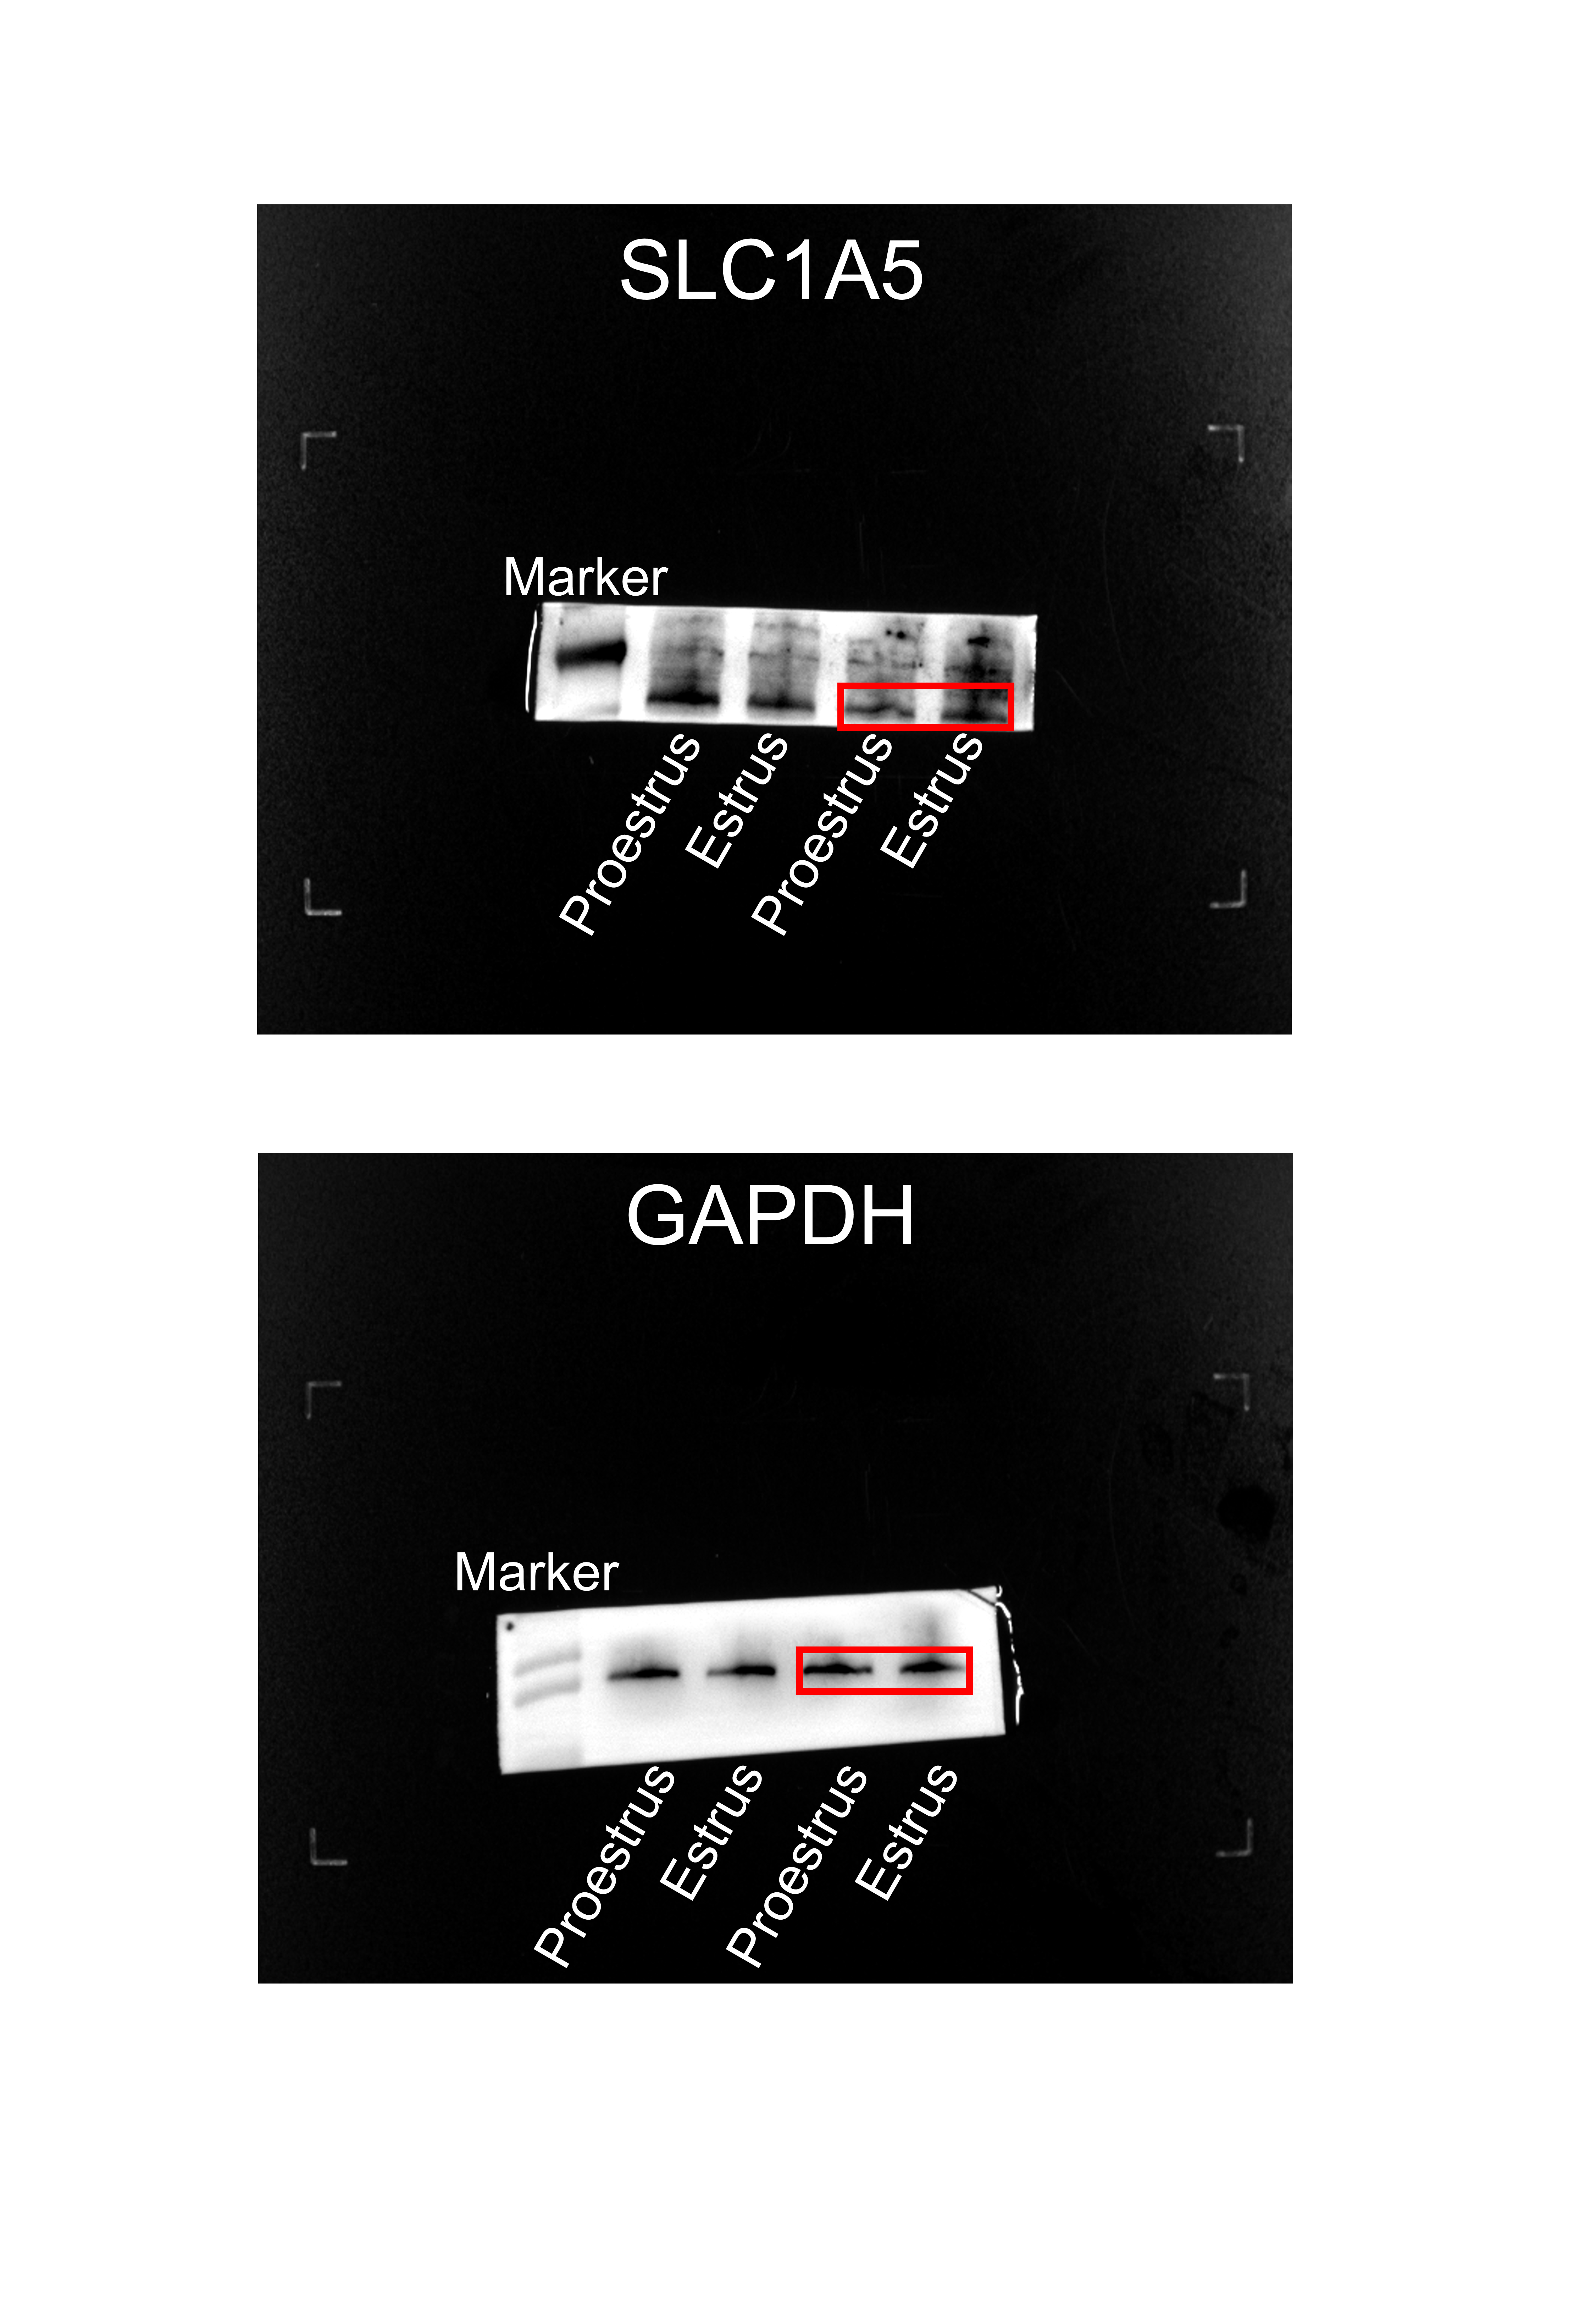


**
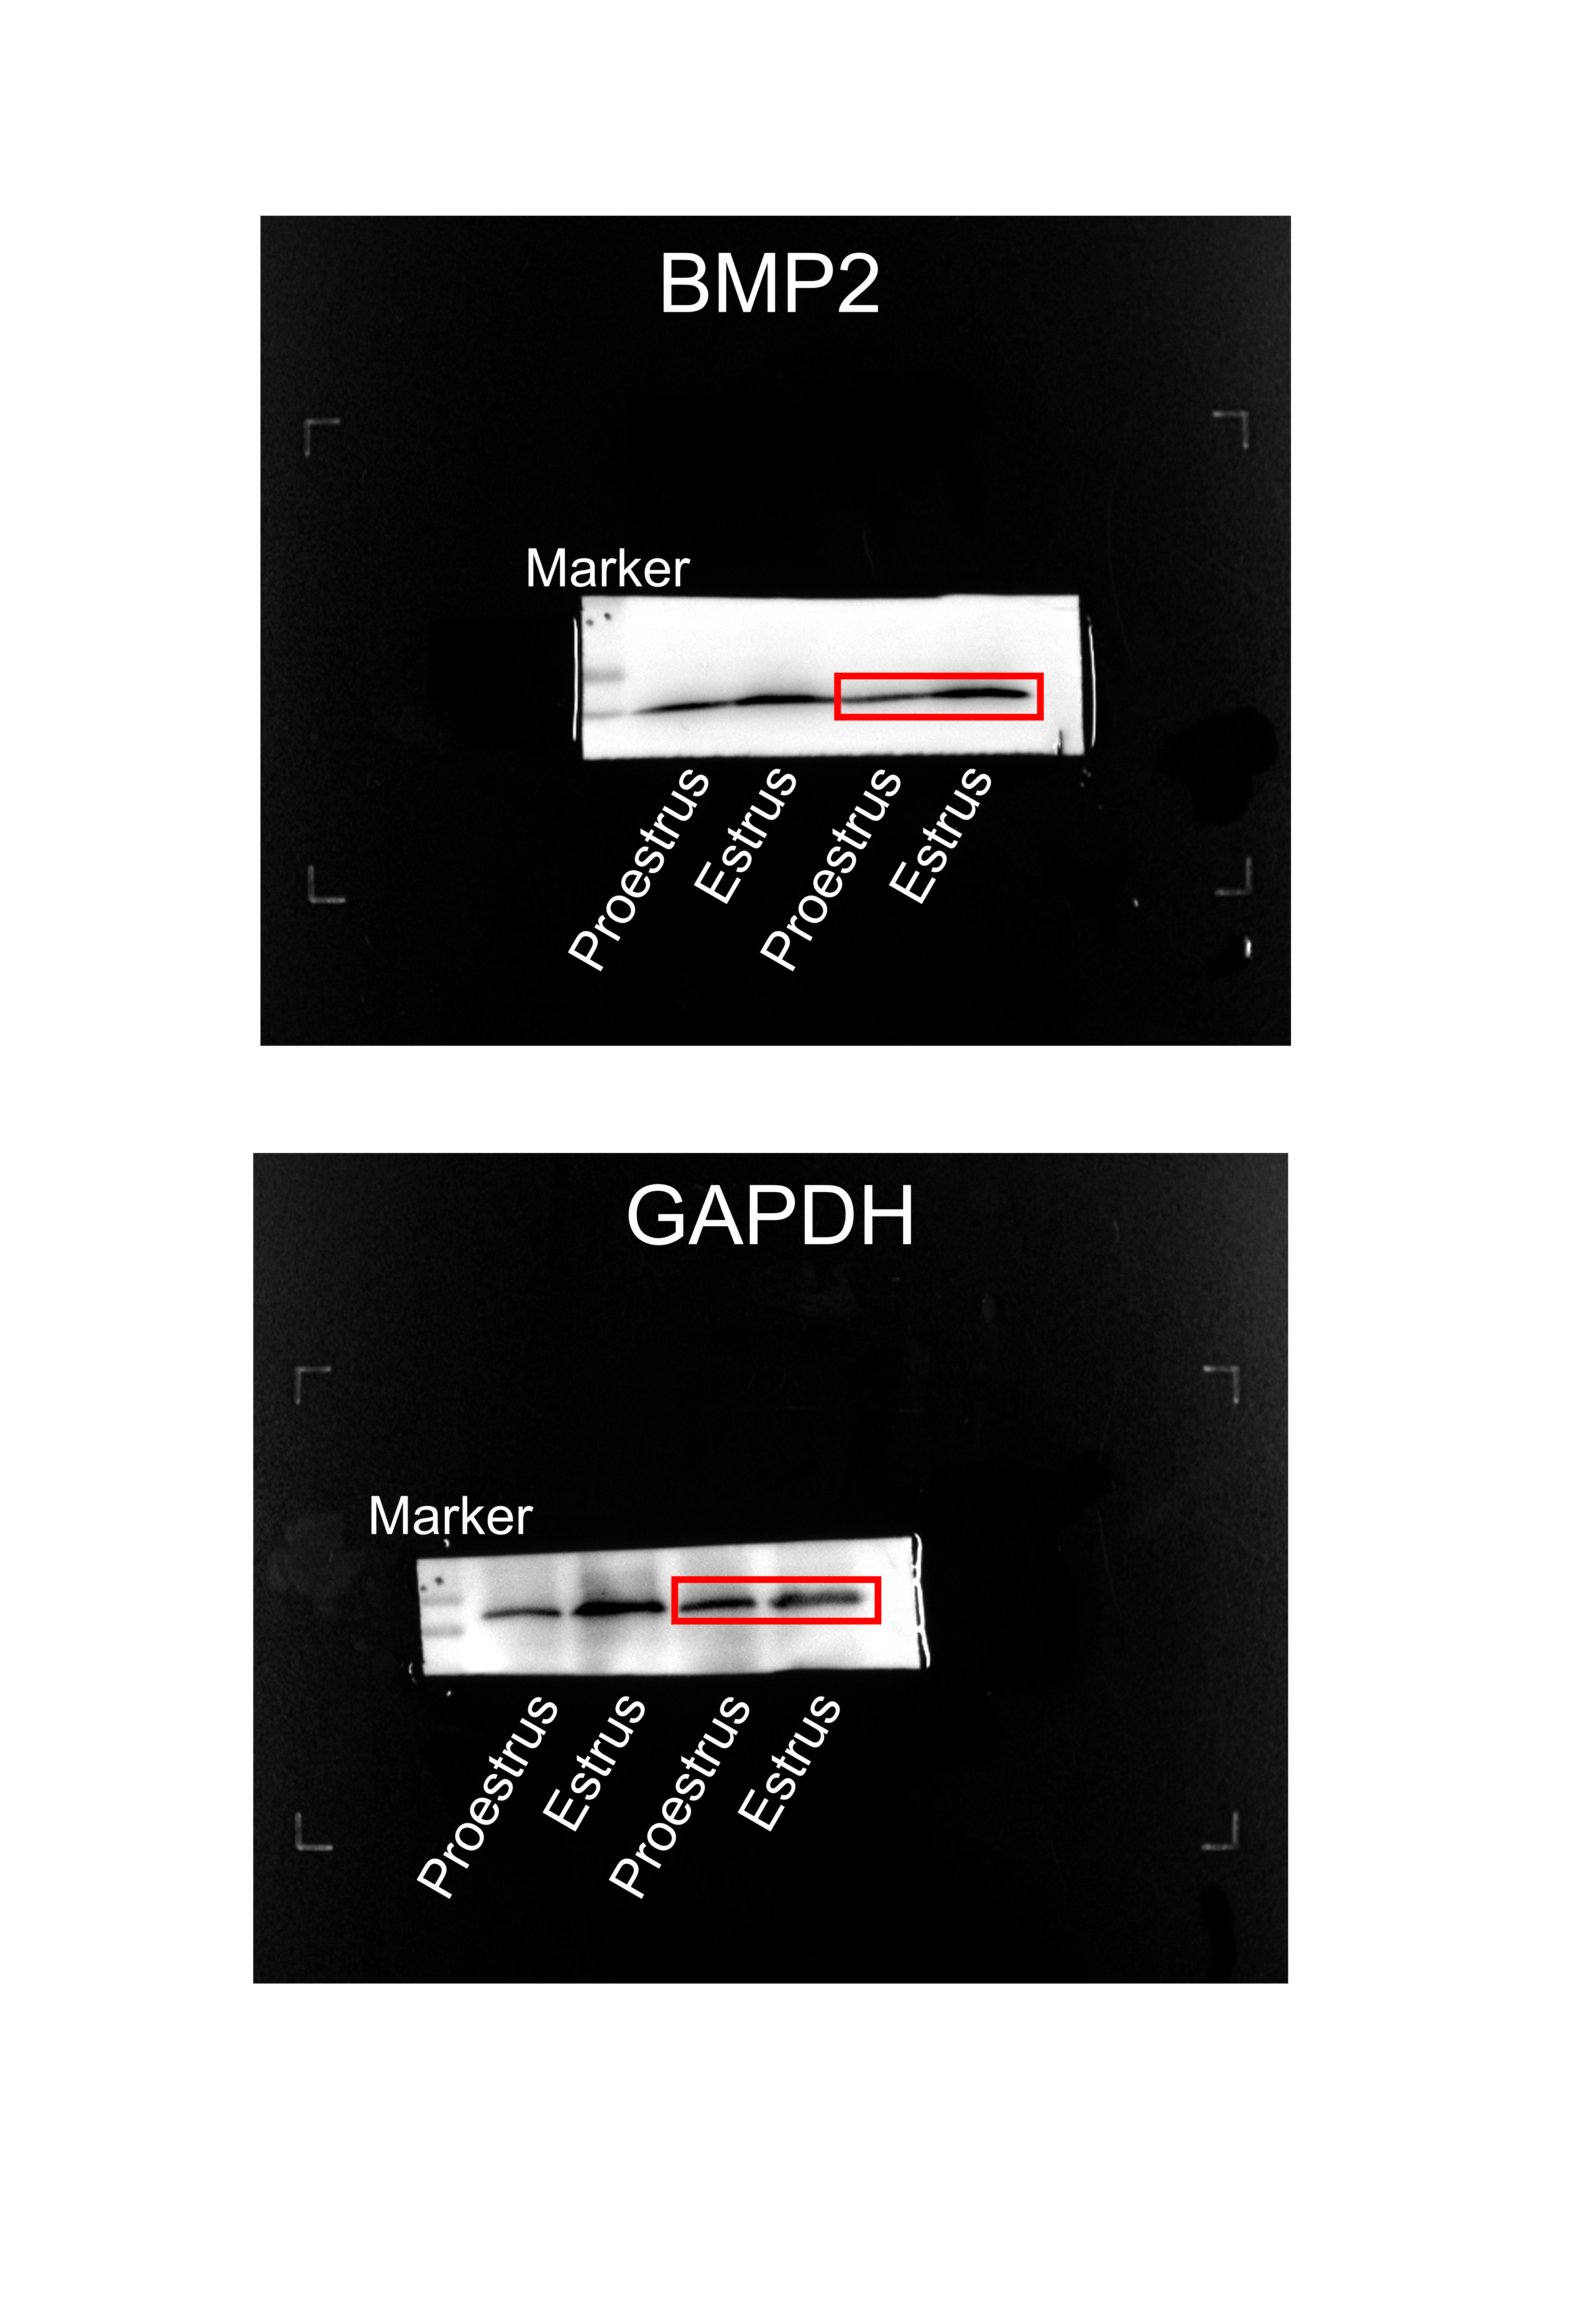
Figure S3** Full-length, original, and unprocessed blot corresponding to Figure 4F and Figure 6E. The boxed region indicates the cropped area shown in the main figure.
