# Supplementary material
Source: Research Square preprint supplement (doi:10.21203/rs.3.rs-8972446/v1)
Supplement: Supplementary file 3 [file d133408e2edc0073ab6f3bb4.docx]

**Supporting Information**

**Table S1** **Antibodies used in this paper**

| **Primary antibodies** | **Vendor** | **Dilution** | Source |
| --- | --- | --- | --- |
| BMP2  GAPDH  SLC1A5 | ABclonal (A27101)  Affnity (AF7021)  ABclonal (A6981) | WB-1:1000  WB-1:2000  WB-1:1000 | Rabbit  Rabbit  Rabbit |

| **Secondary antibodies** | **Vendor** | Dilution |
| --- | --- | --- |
| HRP-conjugated goat anti-rabbit IgG | Beyotime (A0258) | 1:2000 |

**Table S2** **Primers Used for Quantitative RT-PCR**

| **Genes** | **Forward primer** | **Reverse primer** |
| --- | --- | --- |
| *ERBB4* | CTGATGAGGATCGGGAGTGC | TGGCTTTGGGACCAGTTGTT |
| *GAPDH* | CCCCTAACTCACCCGTTCAC | TTGCCCCGCGATCTAATGTT |
| *SLC1A5* | GACCCCTCGGACCCAAAAG | AAAAGCTCCAGACGACGACC |
| *TGFBR3* | AGAAACAGGTCCAAGCACGA | CATCACGGTGAGTGTGTCCA |
| *TSEN2* | GTCTATGCTCTGGGATGTCTG | TTCGGAAGTGATGGTAAGCC |

**
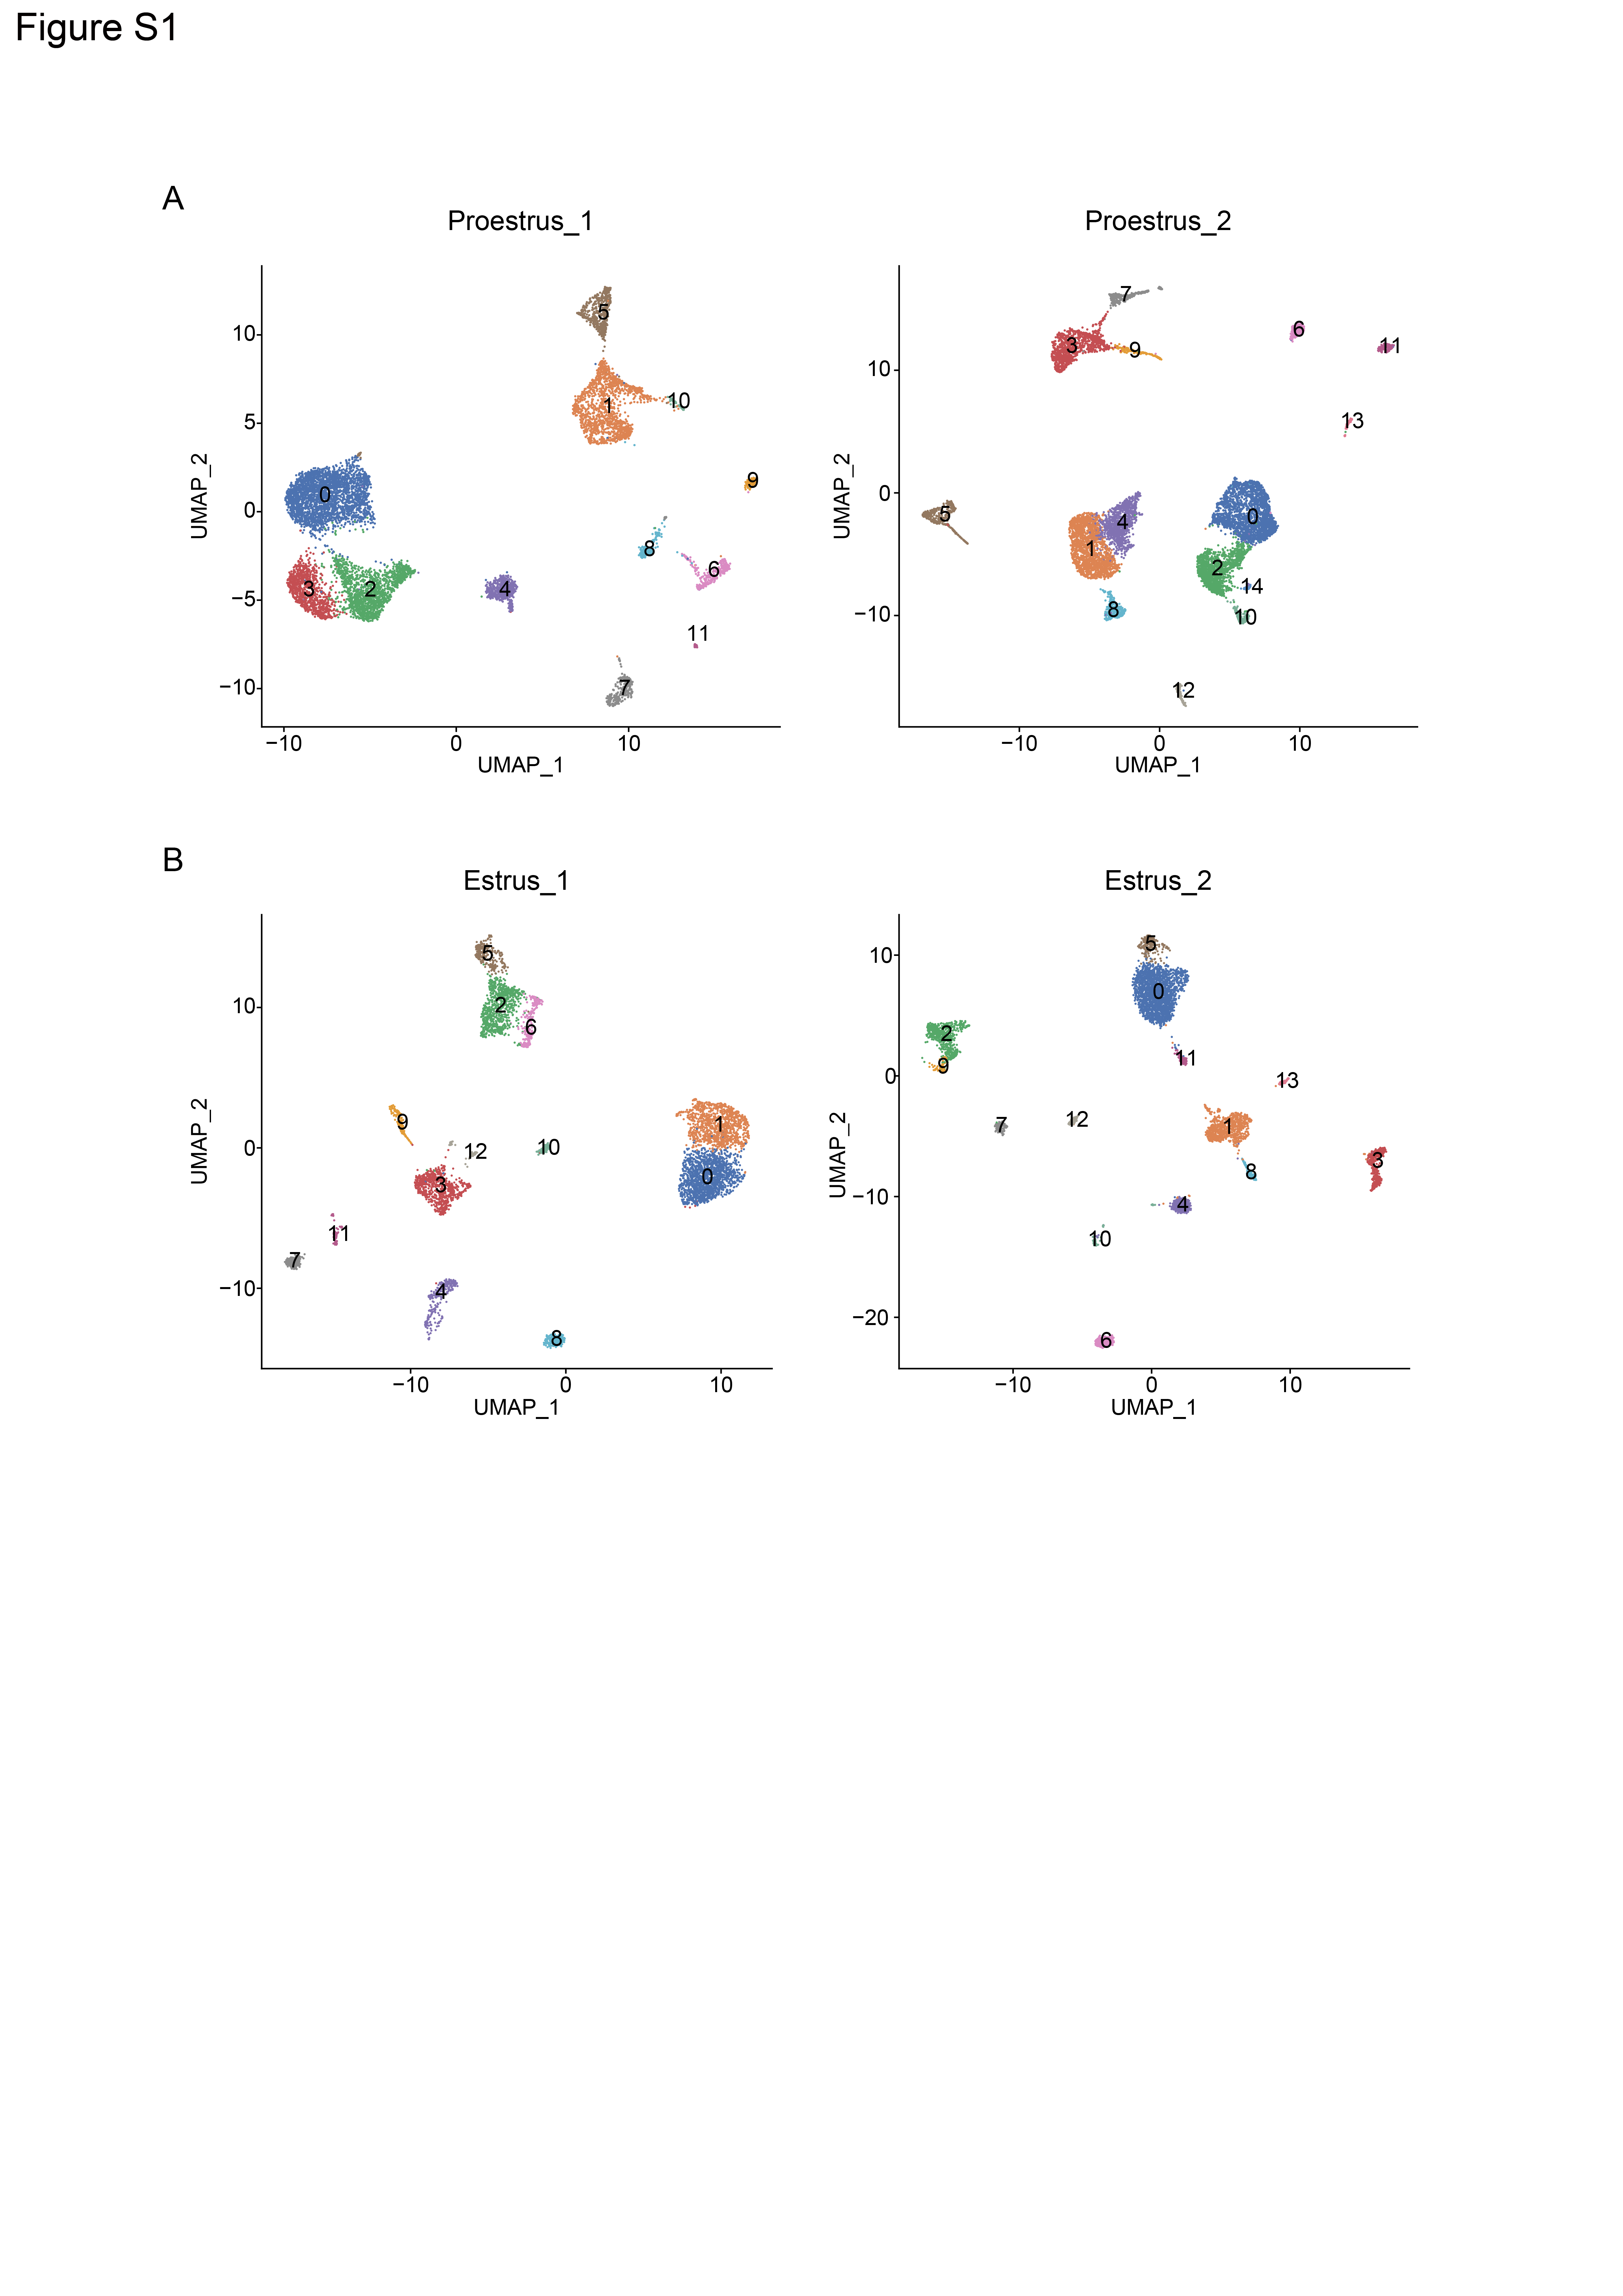
 Figure S1**

Preprocessing of porcine ovarian snRNA-seq data. A: UMAP plots illustrating the ovarian cell populations of two groups during the proestrus phase. B: UMAP plots illustrating the ovarian cell populations of two groups during the estrus phase.


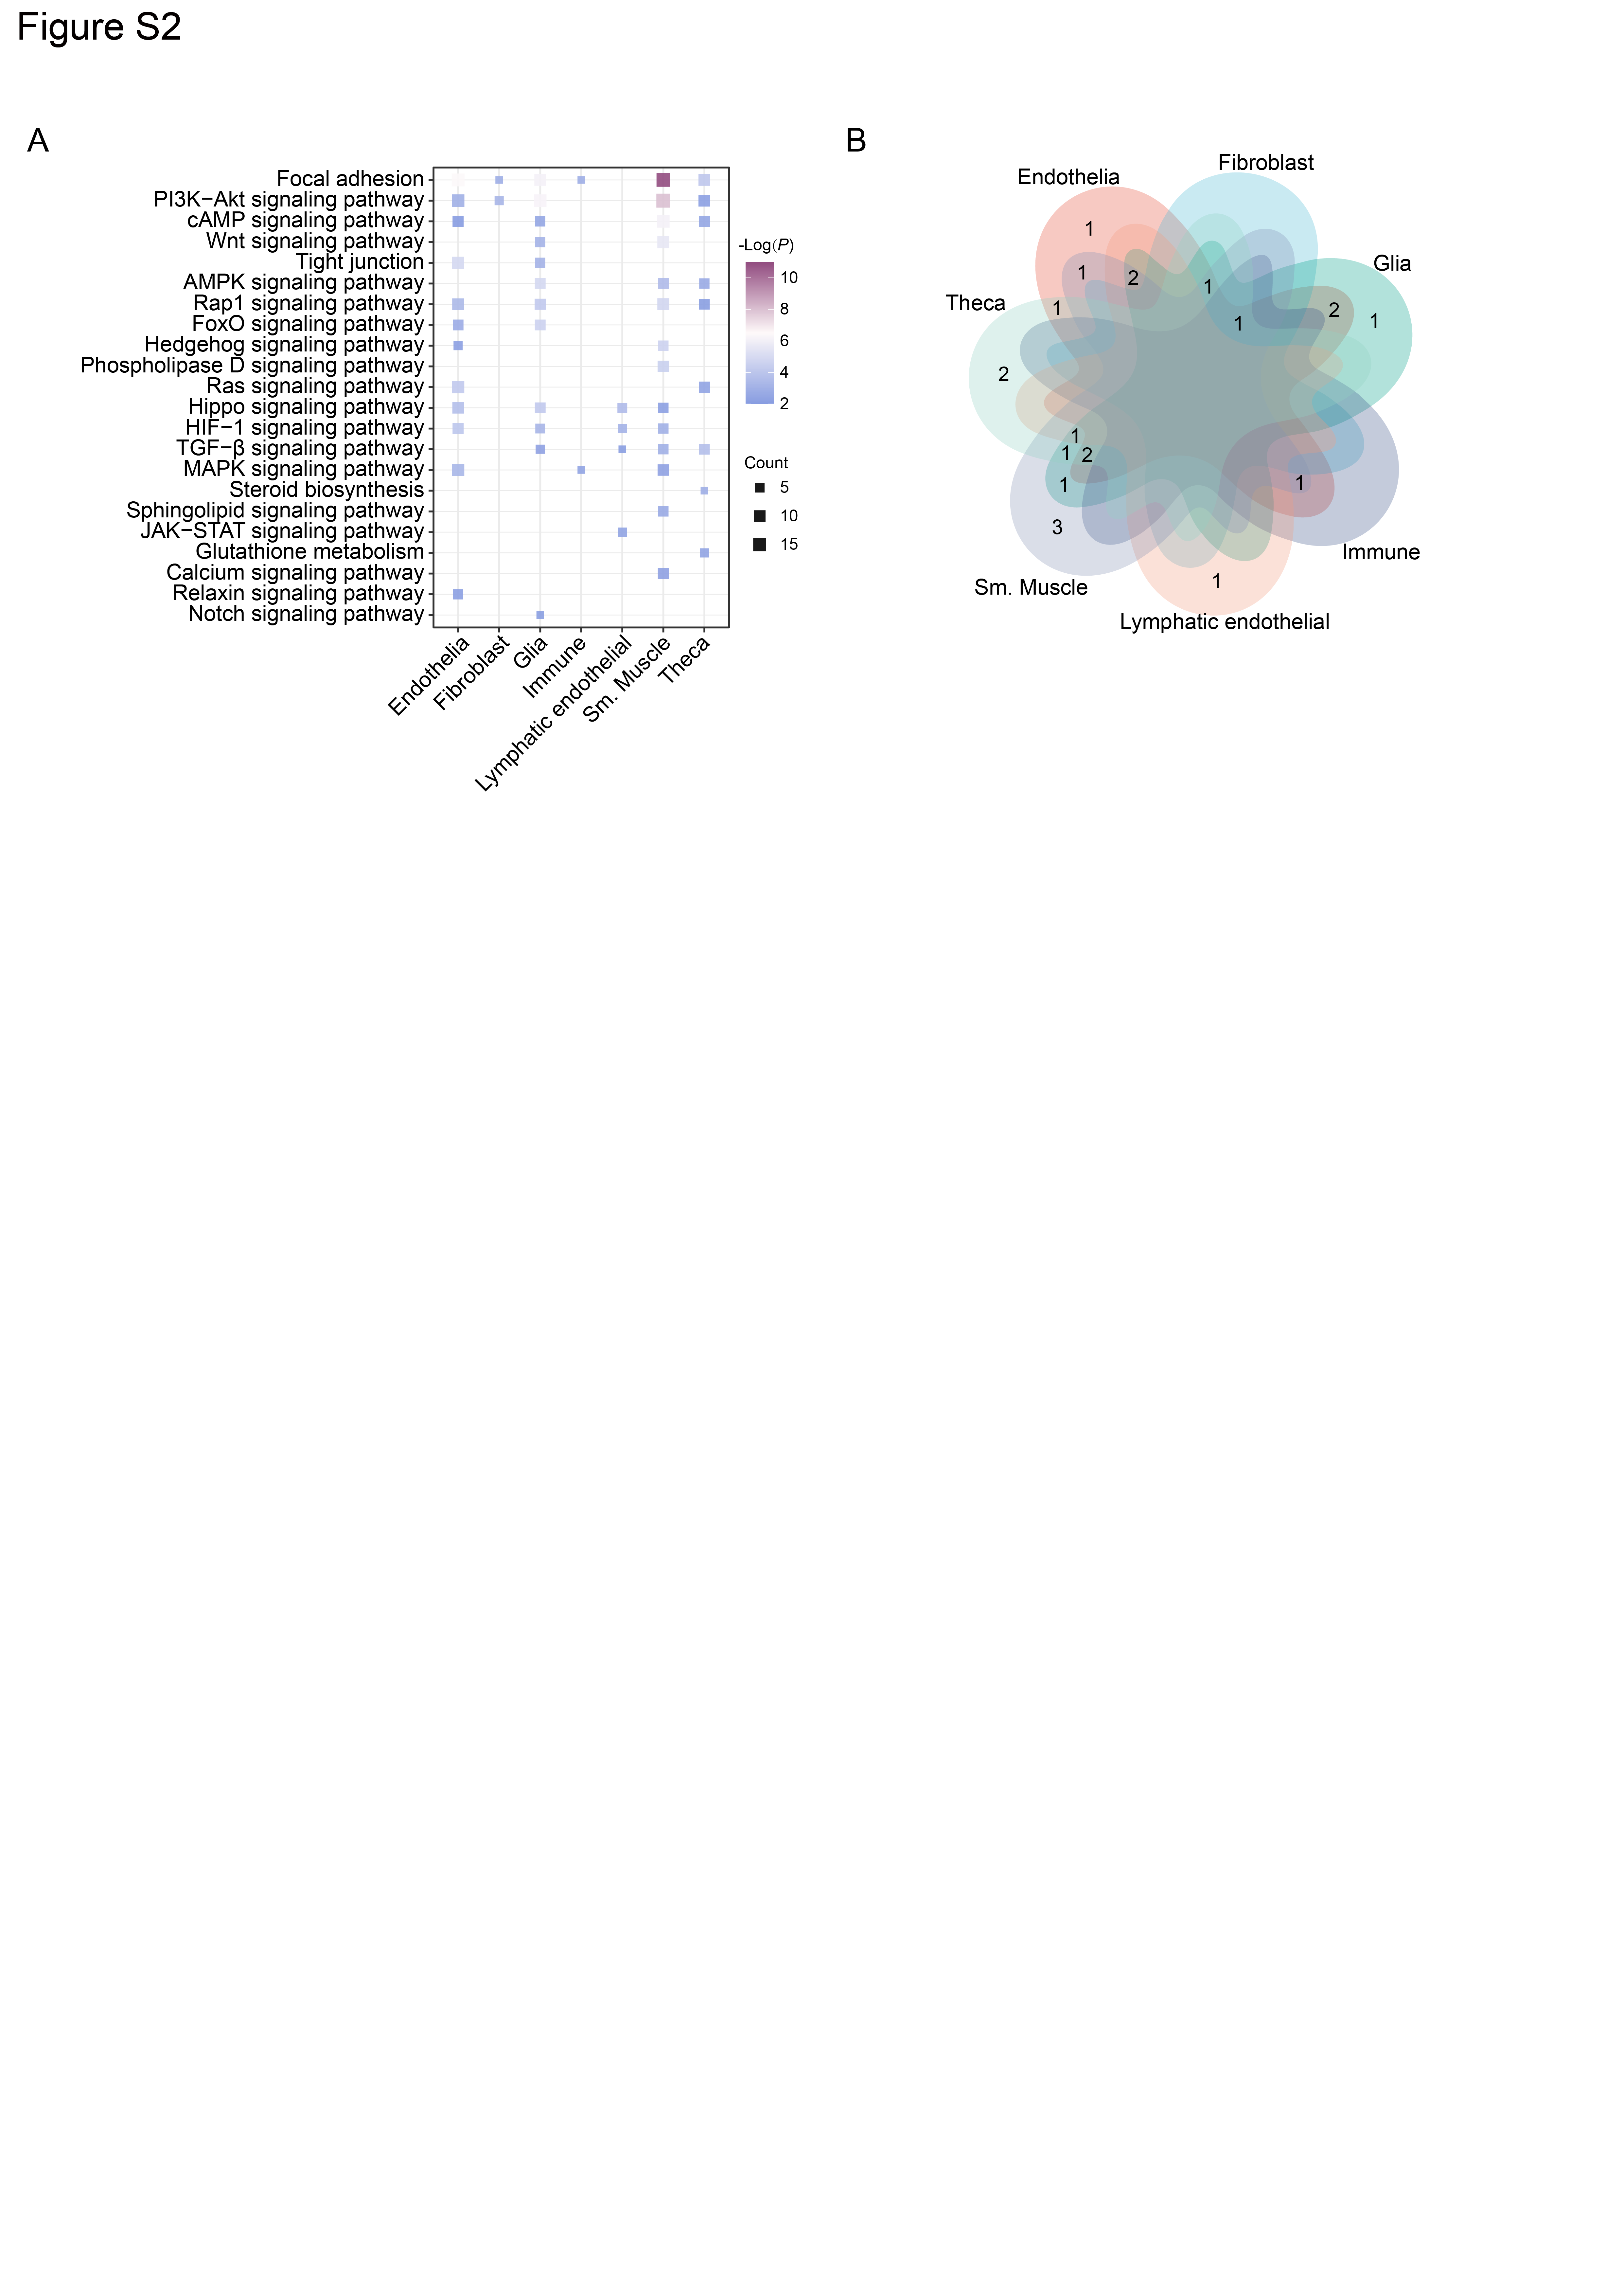
 **Figure S2**

KEGG pathway enrichment and overlap analysis across ovarian cell types. A: KEGG enrichment analysis results for differentially expressed genes in various cell types. B: The Venn diagram illustrates the overlap in KEGG pathway enrichment results across different cell types.
